# Supplementary material
Source: PubMed Central journal article supplement (PMC1459350)
Supplement: pnas_0507416103_1.pdf [file pnas_0507416103_1.pdf]

1035  
 ATP7B GVPRVMRLLLLGDVA-TLPLRKVLAVVGTAEASSEHPLGVAVTKYCKEELGTETL-GYCT  
 ATP7A GTPVVNQVKVLTESN-RISHHKILAIIVGTAESENSEHPLGTAITKYCKQELDTETL-GTCI  
 CadA GVPVVTDFEVLNDQ---VEEKELFSIITAL EYRSQHPLASAIMKKAEQDNIPYSN-VQVE  
 pacS GKPEVTDLVPLNG-----DERELLRLAAIAERRSEHPIAEAIVKKALEHGIELG---EPE  
 CopA GKPQVVAVKTFAD----VDEAQALRLAAAL EQGSSHPLARAILDKAG--DMQLP---QVN  
 ZntA GKPRVTAIHPATG----ISESELLTLAAAVEEQGATHPLAQAIVREAQVAELAI P---TAE  
 CCC2 GFMVVKKFLKDSNWVGNVDEDEVLACIKATESISDHPVSKAIIRYCDGLNCKNALNAVVL  
 \* \* \* \*\* \*\*

1093  
 ATP7B DFQAVPGCGIGCKVSNVEGILAHSERPLSAP-----ASHLNEAGSLPAEKDAVP  
 ATP7A DFQVVPGCGISCKVTNIEGLLHKNWNWNIEDNNIKNASLVQIDASNEQSSTSSSMIIDAQI  
 CadA EFTSITGRGIKGI VNGTT-----  
 pacS KVEVIAGEGVVADG-----  
 CopA GFRTLRLGLVSGEAEAGHA-----  
 ZntA SQRALVGSGLIEAQVNGER-----  
 CCC2 ESEYVLGKGI VSKCQVNG-----  
 \* \*

1142  
 ATP7B -----QTFSVLIGNREWLRNGLT- ISSDVS DAMTDHEMKGQTAILVAIDGVLGMI AI  
 ATP7A SNALNAQQHKVLI GNREWMIRNGLV- INNDVNDFMTEHERKGR TAVLVAVDDEL CGLIAI  
 CadA -----YYIGSPKLFKELNVSD FSLGFENN VKILQNGKTAMIIGTEK TILGVIAV  
 pacS -----ILVGNKRLMEDFGVA- VSNEVELALEKLEREAKTAVIVARNR VEGIIAV  
 CopA -----LLLGNQALLNEQQVG--TKAIEAEIT AQASQGATPVLLAVD GKAVALLAV  
 ZntA -----VLICAA GKH PADAFTGLINELES-----AGQTVVLVVRNDDVLGVIAL  
 CCC2 -----NTYDICI GNEALILEDALK-----KSGFINSNVDQNTVSYVSVNGHV FGLFEI  
 \* \* \* \*\*

1195  
 ATP7B |.....|.....|.....  
 ATP7A ADAVKQEAALAVHTLQSMGVDVVL I-  
 CadA ADTVKPEAELAIHILKSMGLEVVLM-  
 pacS ADEVRETSKNVIQKLHQLGIKQTIML  
 CopA SDTLKESAKPAVQELKRMGIKVGMI-  
 ZntA RDPLRSDSVAALQRLHKAGYRLVML-  
 CCC2 QDTLRADAATAISELNALGVKGVIL-  
 NDEVKHDSYATVQYLQRNGYETYMI-  
 \* \* \*
