# Supplementary material
Source: PubMed Central journal article supplement (PMC1459350)
Supplement: pnas_0507416103_5.pdf [file pnas_0507416103_5.pdf]

**Table 1.** NMR and refinement statistics for the structure of the ATP7B N-domain in a complex with ATP

| <b>NMR distance and dihedral constraints</b>                                     | <b>Value</b>  |
|----------------------------------------------------------------------------------|---------------|
| Distance constraints                                                             |               |
| Total NOEs                                                                       | 1896          |
| Intraresidue                                                                     | 983           |
| Sequential ( $ i-j  = 1$ )                                                       | 560           |
| Medium-range ( $ i-j  \leq 4$ )                                                  | 172           |
| Long-range ( $ i-j  > 4$ )                                                       | 183           |
| Hydrogen bonds                                                                   | 34            |
| Total dihedral angle constraints                                                 | 198           |
| phi                                                                              | 99            |
| psi                                                                              | 99            |
| <b>Structure Statistics</b>                                                      |               |
| Consistent violations in three or more structures                                |               |
| Distance constraints ( $>0.2 \text{ \AA}$ )                                      | 6             |
| Dihedral angle constraints ( $>5^\circ$ )                                        | 0             |
| Max. dihedral angle violation                                                    | 0             |
| Max. distance constraint violation ( $\text{\AA}$ )                              | 0.48          |
| Ramachandran plot distribution (res. 1038-1113;1143-1196)                        |               |
| Most favored regions                                                             | 90            |
| Additionally allowed regions                                                     | 7             |
| Disallowed region                                                                | 3             |
| Average rms deviation to mean structure, $\text{\AA}$ (res. 1038-1113,1143-1196) |               |
| Heavy                                                                            | $1.3 \pm 0.3$ |
| Backbone                                                                         | $0.9 \pm 0.2$ |

NOE, nuclear Overhauser effect.
