# Supplementary material
Source: PubMed Central journal article supplement (PMC1459350)
Supplement: pnas_0507416103_6.pdf [file pnas_0507416103_6.pdf]

**Table 2. Compound secondary chemical shifts of the backbone amides caused by ATP and AMP**

| <b>Residue</b> | <b>ATP</b> | <b>AMP</b> | <b>Residue</b> | <b>ATP</b> | <b>AMP</b> | <b>Residue</b> | <b>ATP</b> | <b>AMP</b> |
|----------------|------------|------------|----------------|------------|------------|----------------|------------|------------|
| <b>1032</b>    | n.d.       | n.d.       | <b>1071</b>    | n.d.       | n.d.       | <b>1110</b>    | 0.0003     | 0.0001     |
| <b>1033</b>    | n.d.       | n.d.       | <b>1072</b>    | 0.0030     | 0.0078     | <b>1111</b>    | 0.0045     | 0.0007     |
| <b>1034</b>    | n.d.       | n.d.       | <b>1073</b>    | 0.0012     | 0.0027     | <b>1112</b>    | 0.0001     | 0.0008     |
| <b>1035</b>    | 0.0006     | 0.0001     | <b>1074</b>    | 0.0004     | 0.0009     | <b>1113</b>    | 0.0080     | 0.0035     |
| <b>1036</b>    | 0.0029     | 0.0023     | <b>1075</b>    | 0.0041     | 0.0007     | <b>1114</b>    | 0.0023     | 0.0004     |
| <b>1037</b>    | n.d.       | n.d.       | <b>1076</b>    | 0.0046     | 0.0003     | <b>1115</b>    | 0.0004     | 0.0019     |
| <b>1038</b>    | 0.0007     | 0.0002     | <b>1077</b>    | 0.0018     | 0.0037     | <b>1116</b>    | 0.0031     | 0.0051     |
| <b>1039</b>    | 0.0172     | 0.0089     | <b>1078</b>    | 0.0122     | 0.0069     | <b>1117</b>    | 0.0031     | 0.0002     |
| <b>1040</b>    | 0.0031     | 0.0027     | <b>1079</b>    | 0.0069     | 0.0052     | <b>1118</b>    | 0.0039     | 0.0002     |
| <b>1041</b>    | 0.0043     | 0.0019     | <b>1080</b>    | 0.0013     | 0.0024     | <b>1119</b>    | n.d.       | n.d.       |
| <b>1042</b>    | 0.0007     | 0.0013     | <b>1081</b>    | 0.0094     | 0.0083     | <b>1120</b>    | 0.0000     | 0.0002     |
| <b>1043</b>    | 0.0001     | 0.0004     | <b>1082</b>    | 0.0013     | 0.0016     | <b>1121</b>    | 0.0022     | 0.0005     |
| <b>1044</b>    | 0.0029     | 0.0016     | <b>1083</b>    | 0.0006     | 0.0001     | <b>1122</b>    | 0.0036     | 0.0001     |
| <b>1045</b>    | 0.0019     | 0.0013     | <b>1084</b>    | 0.0055     | 0.0010     | <b>1123</b>    | n.d.       | n.d.       |
| <b>1046</b>    | 0.0009     | 0.0018     | <b>1085</b>    | 0.0029     | 0.0017     | <b>1124</b>    | 0.0010     | 0.0001     |
| <b>1047</b>    | 0.0007     | 0.0011     | <b>1086</b>    | 0.0047     | 0.0010     | <b>1125</b>    | 0.0024     | 0.0001     |
| <b>1048</b>    | 0.0022     | 0.0030     | <b>1087</b>    | 0.0005     | 0.0009     | <b>1126</b>    | 0.0030     | 0.0001     |
| <b>1049</b>    | 0.0005     | 0.0026     | <b>1088</b>    | 0.0027     | 0.0001     | <b>1127</b>    | 0.0056     | 0.0002     |
| <b>1050</b>    | 0.0033     | 0.0027     | <b>1089</b>    | 0.0024     | 0.0009     | <b>1128</b>    | 0.0037     | 0.0001     |
| <b>1051</b>    | 0.0003     | 0.0042     | <b>1090</b>    | 0.0001     | 0.0013     | <b>1129</b>    | 0.0019     | 0.0000     |
| <b>1052</b>    | n.d.       | n.d.       | <b>1091</b>    | 0.0013     | 0.0002     | <b>1130</b>    | 0.0034     | 0.0001     |
| <b>1053</b>    | 0.0005     | 0.0023     | <b>1092</b>    | 0.0044     | 0.0054     | <b>1131</b>    | 0.0029     | 0.0001     |
| <b>1054</b>    | 0.0026     | 0.0025     | <b>1093</b>    | 0.0054     | 0.0012     | <b>1132</b>    | 0.0017     | 0.0002     |
| <b>1055</b>    | 0.0009     | 0.0006     | <b>1094</b>    | 0.0020     | 0.0011     | <b>1133</b>    | 0.0028     | 0.0001     |
| <b>1056</b>    | 0.0006     | 0.0047     | <b>1095</b>    | 0.0229     | 0.0092     | <b>1134</b>    | n.d.       | n.d.       |
| <b>1057</b>    | 0.0009     | 0.0020     | <b>1096</b>    | 0.0027     | 0.0001     | <b>1135</b>    | 0.0033     | 0.0001     |
| <b>1058</b>    | 0.0029     | 0.0016     | <b>1097</b>    | 0.0072     | 0.0072     | <b>1136</b>    | 0.0027     | 0.0000     |
| <b>1059</b>    | 0.0009     | 0.0012     | <b>1098</b>    | n.d.       | n.d.       | <b>1137</b>    | 0.0034     | 0.0064     |
| <b>1060</b>    | 0.0072     | 0.0061     | <b>1099</b>    | 0.0409     | 0.0126     | <b>1138</b>    | 0.0030     | 0.0002     |
| <b>1061</b>    | 0.0039     | 0.0040     | <b>1100</b>    | 0.0187     | 0.0043     | <b>1139</b>    | 0.0039     | 0.0001     |
| <b>1062</b>    | 0.0038     | 0.0035     | <b>1101</b>    | 0.0590     | 0.0234     | <b>1140</b>    | 0.0031     | 0.0009     |
| <b>1063</b>    | 0.0024     | 0.0006     | <b>1102</b>    | 0.0179     | 0.0018     | <b>1141</b>    | n.d.       | n.d.       |
| <b>1064</b>    | 0.0081     | 0.0010     | <b>1103</b>    | 0.0337     | 0.0169     | <b>1142</b>    | 0.0006     | 0.0006     |
| <b>1065</b>    | 0.0186     | 0.0084     | <b>1104</b>    | 0.0043     | 0.0048     | <b>1143</b>    | 0.0010     | 0.0014     |
| <b>1066</b>    | 0.0221     | 0.0120     | <b>1105</b>    | 0.0009     | 0.0012     | <b>1144</b>    | 0.0059     | 0.0060     |
| <b>1067</b>    | 0.0024     | 0.0016     | <b>1106</b>    | 0.0039     | 0.0000     | <b>1145</b>    | 0.0027     | 0.0014     |
| <b>1068</b>    | 0.0058     | 0.0027     | <b>1107</b>    | 0.0055     | 0.0044     | <b>1146</b>    | 0.0086     | 0.0049     |
| <b>1069</b>    | n.d.       | n.d.       | <b>1108</b>    | 0.0059     | 0.0016     | <b>1147</b>    | 0.0052     | 0.0021     |
| <b>1070</b>    | n.d.       | n.d.       | <b>1109</b>    | 0.0030     | 0.0005     | <b>1148</b>    | 0.0047     | 0.0004     |

|             |        |        |             |        |        |             |        |        |
|-------------|--------|--------|-------------|--------|--------|-------------|--------|--------|
| <b>1149</b> | 0.0102 | 0.0049 | <b>1165</b> | 0.0019 | 0.0007 | <b>1181</b> | 0.0299 | 0.0036 |
| <b>1150</b> | 0.0031 | 0.0071 | <b>1166</b> | 0.0058 | 0.0044 | <b>1182</b> | 0.0069 | 0.0088 |
| <b>1151</b> | 0.0091 | 0.0000 | <b>1167</b> | 0.0037 | 0.0018 | <b>1183</b> | 0.0015 | 0.0008 |
| <b>1152</b> | 0.0029 | 0.0004 | <b>1168</b> | 0.0024 | 0.0001 | <b>1184</b> | 0.0019 | 0.0000 |
| <b>1153</b> | 0.0008 | 0.0047 | <b>1169</b> | 0.0052 | 0.0050 | <b>1185</b> | 0.0017 | 0.0015 |
| <b>1154</b> | 0.0030 | 0.0010 | <b>1170</b> | 0.0005 | 0.0002 | <b>1186</b> | 0.0022 | 0.0002 |
| <b>1155</b> | 0.0019 | 0.0001 | <b>1171</b> | 0.0030 | 0.0037 | <b>1187</b> | 0.0040 | 0.0020 |
| <b>1156</b> | 0.0026 | 0.0035 | <b>1172</b> | 0.0045 | 0.0036 | <b>1188</b> | 0.0037 | 0.0006 |
| <b>1157</b> | 0.0027 | 0.0020 | <b>1173</b> | 0.0043 | 0.0001 | <b>1189</b> | 0.0023 | 0.0027 |
| <b>1158</b> | 0.0098 | 0.0062 | <b>1174</b> | 0.0064 | 0.0026 | <b>1190</b> | 0.0044 | 0.0010 |
| <b>1159</b> | 0.0111 | 0.0055 | <b>1175</b> | 0.0009 | 0.0009 | <b>1191</b> | 0.0052 | 0.0069 |
| <b>1160</b> | 0.0004 | 0.0005 | <b>1176</b> | 0.0011 | 0.0002 | <b>1192</b> | 0.0058 | 0.0096 |
| <b>1161</b> | 0.0006 | 0.0020 | <b>1177</b> | 0.0016 | 0.0025 | <b>1193</b> | 0.0014 | 0.0016 |
| <b>1162</b> | 0.0007 | 0.0000 | <b>1178</b> | 0.0025 | 0.0012 | <b>1194</b> | 0.0032 | 0.0021 |
| <b>1163</b> | 0.0020 | 0.0004 | <b>1179</b> | 0.0037 | 0.0050 | <b>1195</b> | 0.0032 | 0.0023 |
| <b>1164</b> | 0.0011 | 0.0004 | <b>1180</b> | 0.0018 | 0.0019 | <b>1196</b> | 0.0011 | 0.0002 |

Compound relative values of backbone amide chemical shifts were calculated as described in Fig 4. Secondary chemical shifts could not be measured (n.d.) in several cases of heavy signal overlap and for proline residues.
