# Supplementary material
Source: PubMed Central journal article supplement (PMC1459350)

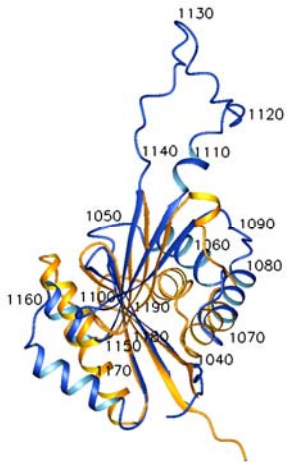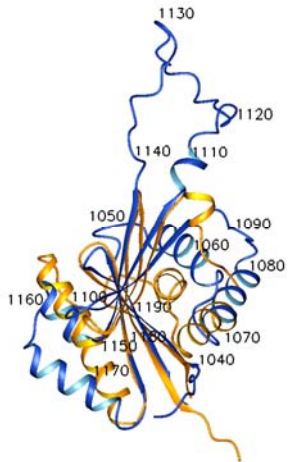

Supplement: pnas_0507416103_2.pdf [file pnas_0507416103_2.pdf]

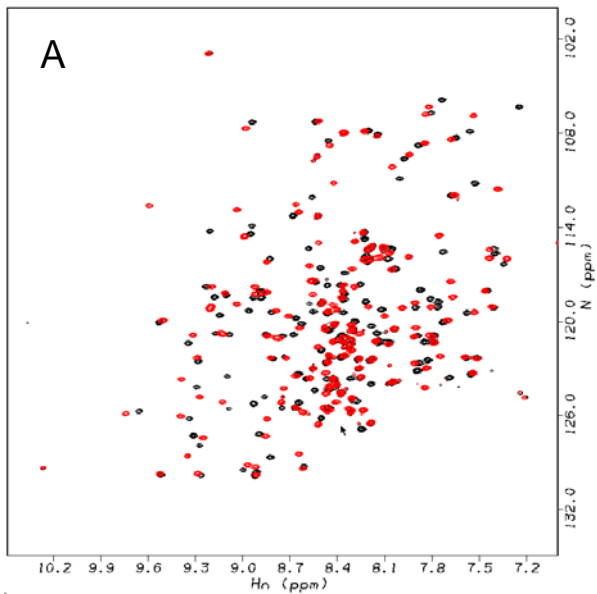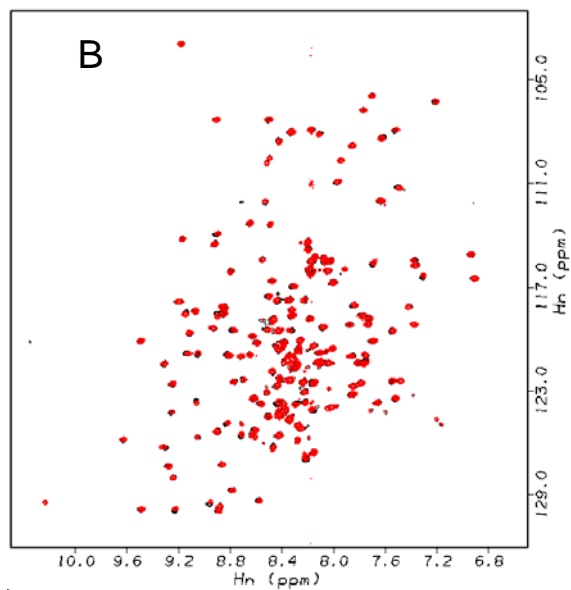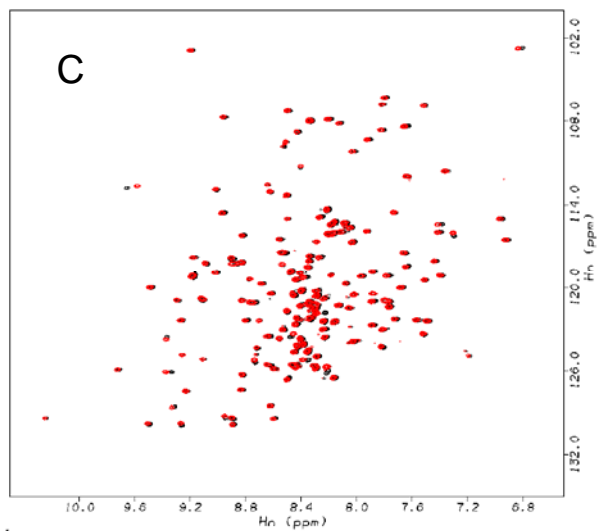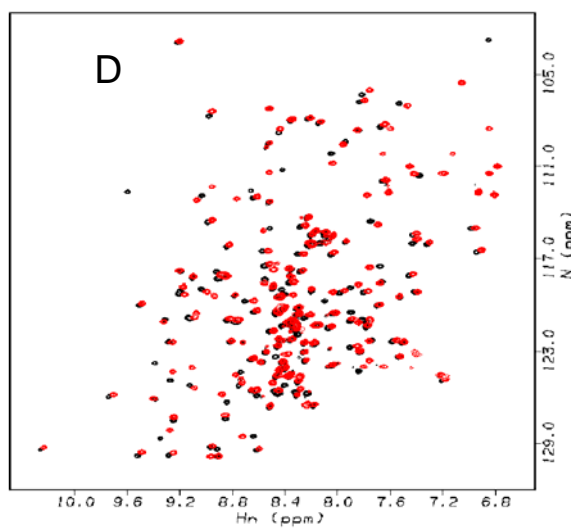

Supplement: pnas_0507416103_3.pdf [file pnas_0507416103_3.pdf]

**A**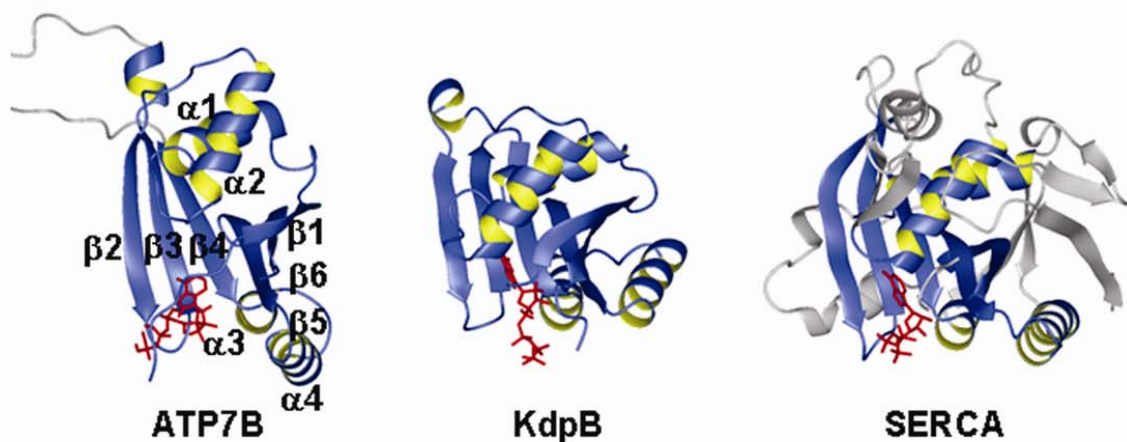**B**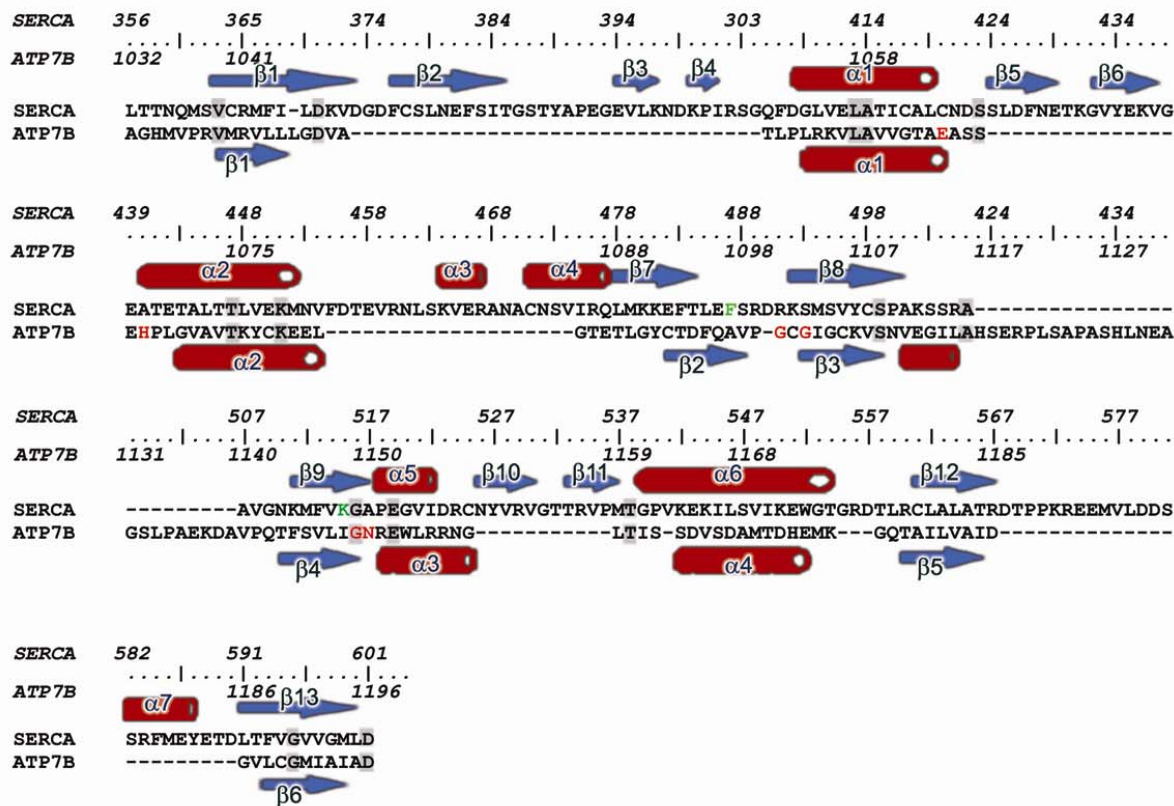

Supplement: pnas_0507416103_4.pdf [file pnas_0507416103_4.pdf]
